# Supplementary material for: A new redox site as an alternative to ferrocene to study electron transfer in self-assembled monolayersElectronic supplementary information (ESI) available: ac voltammograms, amount of redox active molecules determination, fitting law and SAM preparation protocol. See http://www.rsc.org/suppdata/cc/b2/b205073k/
Source: Royal Society of Chemistry journal article supplement (doi:10.1039/b205073k), 2002-08-05
Supplement: b205073k.doc [file b205073k.doc]

# Supplementary data

A New Redox Site as an Alternative to Ferrocene to Study Electron Transfer in Self-Assembled Monolayers

Cédric Hortholary, Freddy Minc, Christophe Coudret,* Jacques Bonvoisin* and Jean-Pierre Launay

# *CEMES-CNRS, 29 rue Jeanne Marvig, BP4347, 31055 Toulouse cedex 4, France. Fax: +33 5 62 25 79 99; Tel: +33 5 62 25 78 59;*

**AC voltammograms**

Representative ac Voltammograms at seven different frequencies for a gold ball electrode coated with **A** and 11-mercaptoundecanol (ratio 1:15). Voltammograms were acquired in a 1 M NaClO4 electrolyte, with bias potential applied *vs* a Ag/AgCl reference electrode.

# Determination of the amount of the redox active molecules

In the model of a Nernstian distribution of states perturbed by a superimposed potential oscillation, the average number of redox sites is proportional, for the low frequency region to the amplitude of the faradaic response of the SAM. The latter is obtained from our experimental ac voltammograms by subtracting the background (capacitive) admittance (recorded at 0.05 V) from the peak one. Our SAM preparation protocol gives a reproducible coverage of 2.2 10-11 mol/cm2 .

with  the pulsation of the superimposed potential oscillation and No the number of moles adsorbate.

# Randles equivalent circuit and data processing

For an adsorbed redox active species in a concentrated supporting electrolyte, the electrode behavior is modelled as the following equivalent circuit

Randles equivalent circuit. Rsol : uncompensated solution resistance ; CDL : double layer capacitance ; Cads : adsorption capacitance ; RCT : charge transfer resistance.

The experimental data are fitted according the following law:

with ko=1/ (2 RCT CAds) and =1+ CAds / CDL

# SAM preparation

A mixed monolayer of the redox active molecule (0.1 mM) and 11-mercaptoundecanol is prepared by immersing a gold ball electrode in a coating solution in ethanol (ratio 1:15) during 15 minutes at room temperature, and then in a 1 mM 11-mercaptoundecanol solution in ethanol during 4 hours. This optimizes the crystalization of the alkane thiol monolayer and removes defective species placed at the SAM grain boundaries. It is probed by the evaluation of dispersion of the ET.
